# Supplementary material for: Flood risk reduction and flow buffering as ecosystem services – Part 2: Land use and rainfall intensity effects in Southeast Asia
Source: Copernicus journal article supplement (doi:10.5194/hess-21-2341-2017), 2017-05-05
Supplement: Supplementary file 1 [file hess-21-2341-2017-supplement.zip]

# Guideline to derive the Flow Persistence (FlowPer) Metric

Lisa Tanika and Meine van Noordwijk; World Agroforestry Centre (ICRAF)

## INTRODUCTION

The Flow Persistence (FlowPer) metric of temporal autocorrelation of empirical or simulated river flow is key to a simple model. The basic form of the Flowper model is a recursive relationship between river flow  $Q$  on subsequent days:  $Q(t+1) = F_p Q(t) + \varepsilon$ , where  $Q(t)$ ,  $Q(t+1)$  = river flow on subsequent days,  $F_p$  = flow persistence value ( $0 < F_p < 1$ ),  $\varepsilon$  = random variate reflecting inputs from recent rainfall.

The FlowPer metric provides two functions:

1. Summarize the key parameters that can be observed on the flow pattern to assess the watershed condition,
2. Drive, in combination with a random  $\varepsilon$  generator a parsimonious “null model” that allows quantification of the gain in skill in predicting river flow patterns for spatially explicit models that respond to changes in land cover/land use parameters.

## MINIMUM MODEL REQUIREMENT

1. The FlowPer calculations can be run in Microsoft Excel and the model can be downloaded in World Agroforestry Centre website in <http://www.worldagroforestry.org/output/flowper-flow-persistence-model>. While the FlowPer metric derivation for a R platform is being developed.
2. Any time-series of daily river discharge data can be used, but preferably covering at least one year. If station-level daily rainfall data is available it can support the interpretation of apparent variation in  $F_p$  based on rainfall persistence patterns.

## GETTING STARTED WITH FLOWPER MODEL IN EXCEL

1. Open the excel file of FlowPer model (FlowPer Model.xlsm), and you will find the interface of FlowPer model.

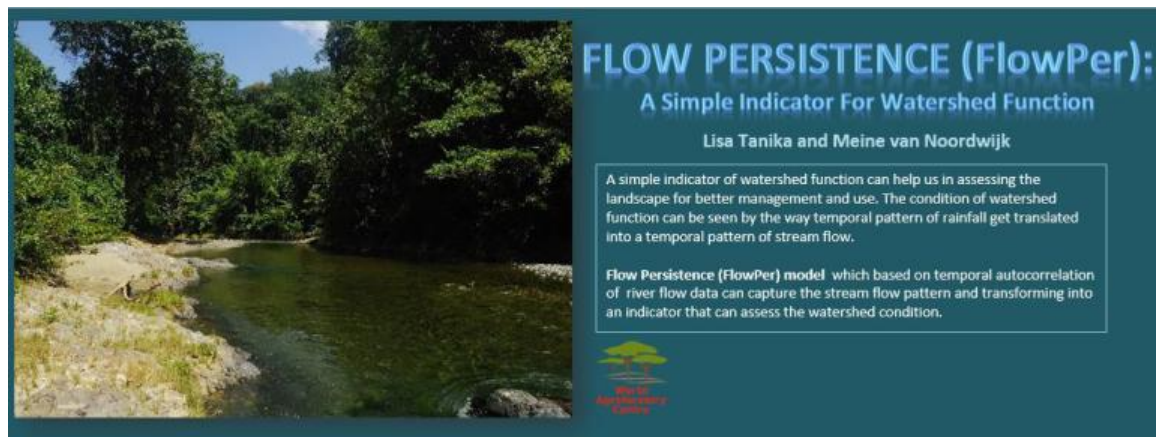

Figure 1. The interface of Flow Persistence model

2. Click in the title of 'FLOW PERSISTENCE (FlowPer)' that will bring you to the 'Read Me' page as the main page of FlowPer model.

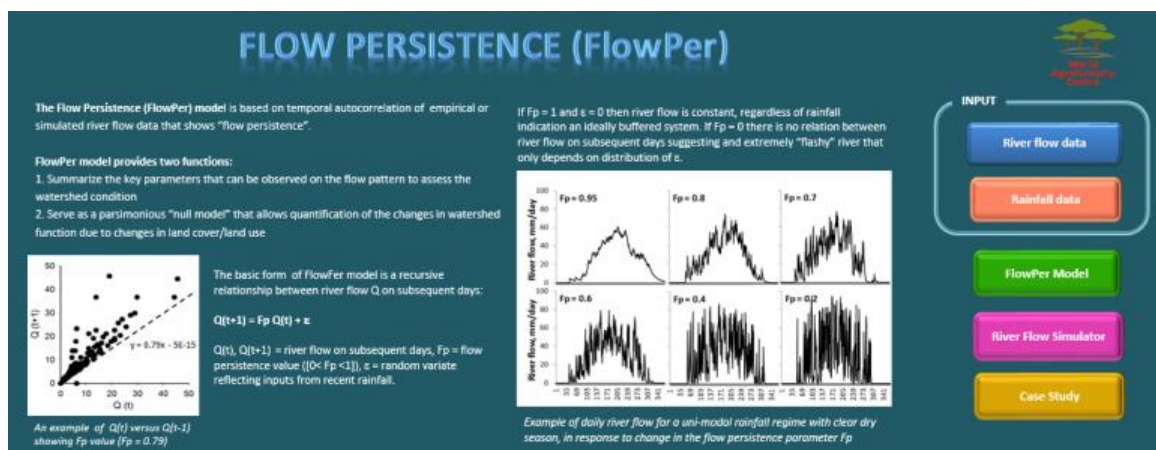

Figure 2. The 'Read Me' page of FlowPer model

3. Click 'River Flow data' to entry the daily river flow data. Adjust 'Start Year' based on your daily river flow data. Then back to the 'Read Me' page.

## River Flow Data

Back To READ ME

The minimum input for FlowPer Model, at least one year data

Start Year 1989

You should only change value in blue

| DOY | MOY | Period |      | 1989 | 1990  | 1991 | 1992  | 1993  | 1994 | 1995  | 1996  | 1997  | 1998 | 1999 | 2000  | 2001  | 2002 | 2003  |
|-----|-----|--------|------|------|-------|------|-------|-------|------|-------|-------|-------|------|------|-------|-------|------|-------|
|     |     |        |      | 1    | 2     | 3    | 4     | 5     | 6    | 7     | 8     | 9     | 10   | 11   | 12    | 13    | 14   | 15    |
| 1   | 1   | 1      | 1    | 23.0 | 15.72 | 13.9 | 19.65 | 17.82 | 9.25 | 20.62 | 21.3  | 18.1  | 14   | 6.9  | 20.78 | 18.63 | 17.8 | 25    |
| 2   | 1   | 1      | 1.01 | 22.6 | 15.4  | 13.9 | 19.3  | 17.4  | 9    | 20.24 | 21.3  | 18.1  | 14   | 6.9  | 20.29 | 17.81 | 17.4 | 26.8  |
| 3   | 1   | 1      | 1.02 | 22.6 | 15.08 | 13.6 | 18.6  | 16.26 | 9    | 20.24 | 21.3  | 18.1  | 13.6 | 6.4  | 20.29 | 17.42 | 16.7 | 31    |
| 4   | 1   | 1      | 1.03 | 22.1 | 14.76 | 13.6 | 18.25 | 15.5  | 9    | 19.48 | 21.3  | 17.26 | 13.6 | 6.65 | 20.29 | 17.81 | 16.7 | 29.8  |
| 5   | 1   | 1      | 1.04 | 21.7 | 14.44 | 13.6 | 17.9  | 14.36 | 9    | 18.72 | 20.85 | 17.26 | 13.2 | 6.65 | 19.38 | 17.81 | 16.7 | 27.4  |
| 6   | 1   | 1      | 1.05 | 21.7 | 14.44 | 13.6 | 17.2  | 14.36 | 9    | 18.72 | 20.85 | 16.84 | 12.8 | 6.65 | 18.12 | 17.81 | 16.7 | 50.25 |
| 7   | 1   | 1      | 1.06 | 21.7 | 14.44 | 13.6 | 16.85 | 14.36 | 8.6  | 18.72 | 20.85 | 16    | 12.4 | 6.4  | 18.12 | 17.81 | 16.3 | 43.5  |
| 8   | 1   | 1      | 1.07 | 21.2 | 14.12 | 13.3 | 16.5  | 13.98 | 8.8  | 18.72 | 20.85 | 16    | 12   | 6.4  | 18.12 | 17.42 | 15.9 | 34    |
| 9   | 1   | 1      | 1.08 | 20.8 | 13.8  | 12.4 | 16.15 | 13.98 | 8.8  | 18.34 | 20.4  | 16    | 12   | 6.4  | 18.12 | 16.64 | 15.5 | 29.8  |
| 10  | 1   | 1      | 1.09 | 20.4 | 13.18 | 12.1 | 16.15 | 13.98 | 8.6  | 18.34 | 19.95 | 16.42 | 12.4 | 6.15 | 18.12 | 16.64 | 15.5 | 27.4  |
| 11  | 1   | 1      | 1.1  | 19.9 | 12.56 | 12.4 | 15.8  | 13.6  | 8.6  | 18.34 | 19.5  | 17.26 | 12.4 | 6.15 | 18.12 | 16.64 | 15.1 | 25.6  |
| 12  | 1   | 1      | 1.11 | 19.5 | 12.56 | 12.1 | 16.15 | 13.6  | 8    | 17.58 | 19.5  | 16.42 | 12   | 6.15 | 17.7  | 16.64 | 14.7 | 24    |

Figure 3. Page of River Flow Data

- If you have daily rainfall data, you can click 'Rainfall data' to entry the data in the same way when entering the river flow data. Then back to the 'Read Me' page.

## Rainfall Data (mm)

Back To READ ME

Daily rainfall data as the supporting input for FlowPer

You should only change value in blue font !

| DOY | MOY | Period |      | 1989 | 1990 | 1991 | 1992 | 1993 | 1994 | 1995 | 1996 | 1997 | 1998 | 1999 | 2000 | 2001 | 2002  | 2003   | 2004 |
|-----|-----|--------|------|------|------|------|------|------|------|------|------|------|------|------|------|------|-------|--------|------|
|     |     |        |      | 1    | 2    | 3    | 4    | 5    | 6    | 7    | 8    | 9    | 10   | 11   | 12   | 13   | 14    | 15     | 16   |
| 1   | 1   | 1      | 1    | 0.0  | 0    | 0    | 0    | 0    | 0    | 0    | 0    | 0    | 0    | 0    | 0    | 0    | 0     | 2.2376 |      |
| 2   | 1   | 1      | 1.01 | 0.0  | 0    | 0    | 0    | 0    | 0    | 0    | 0    | 0    | 0    | 0    | 0    | 0    | 0     | 3.8416 |      |
| 3   | 1   | 1      | 1.02 | 0.0  | 0    | 0    | 0    | 0    | 0    | 0    | 0    | 0    | 0    | 0    | 0    | 0    | 0     | 0      |      |
| 4   | 1   | 1      | 1.03 | 0.0  | 0    | 0    | 0    | 0    | 0    | 0    | 0    | 0    | 0    | 0    | 0    | 0    | 0     | 0      |      |
| 5   | 1   | 1      | 1.04 | 0.0  | 0    | 0    | 0    | 0    | 0    | 0    | 0    | 0    | 0    | 0    | 0    | 0    | 0     | 13.208 |      |
| 6   | 1   | 1      | 1.05 | 0.0  | 0    | 0    | 0    | 0    | 0    | 0    | 0    | 0    | 0    | 0    | 0    | 0    | 0     | 0.0198 |      |
| 7   | 1   | 1      | 1.06 | 0.0  | 0    | 0    | 0    | 0    | 0    | 0    | 0    | 0    | 0    | 0    | 0    | 0    | 0     | 0      |      |
| 8   | 1   | 1      | 1.07 | 0.0  | 0    | 0    | 0    | 0    | 0    | 0    | 0    | 0    | 0    | 0    | 0    | 0    | 0     | 0      |      |
| 9   | 1   | 1      | 1.08 | 0.0  | 0    | 0    | 0    | 0    | 0    | 0    | 0    | 0    | 0    | 0    | 0    | 0    | 0     | 0      |      |
| 10  | 1   | 1      | 1.09 | 0.0  | 0    | 0    | 0    | 0    | 0    | 0    | 0    | 0    | 0    | 0    | 0    | 0    | 0     | 0      |      |
| 11  | 1   | 1      | 1.1  | 0.0  | 0    | 0    | 0    | 0    | 0    | 0    | 0    | 0    | 0    | 0    | 0    | 0    | 0     | 0      |      |
| 12  | 1   | 1      | 1.11 | 0.0  | 0    | 0    | 0    | 0    | 0    | 0    | 0    | 0    | 0    | 0    | 0    | 0    | 0     | 0      |      |
| 13  | 1   | 1      | 1.12 | 0.0  | 0    | 0    | 0    | 0    | 0    | 0    | 0    | 0    | 0    | 0    | 0    | 0    | 0.802 | 0      |      |

Figure 4. Page of Rainfall Data

- Click 'FlowPer model' to run the model. If you only want to run a certain year, enter the year in the 'Year' then click 'Go'. The result will be shown both in the form of value and graph.

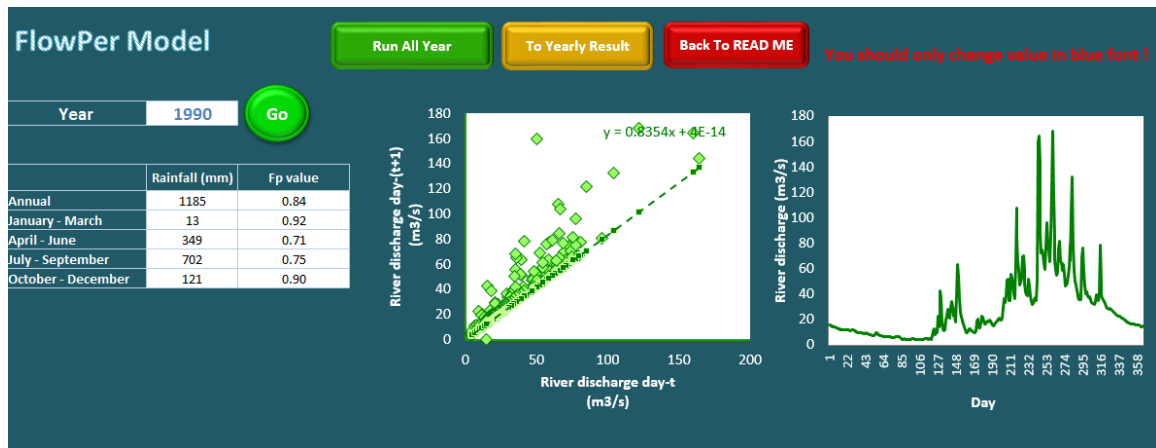

Figure 5. The page of 'FlowPer model'

- If you want to run the entire year, click 'Run All Year' and you can see the result by clicking 'To Yearly Result'

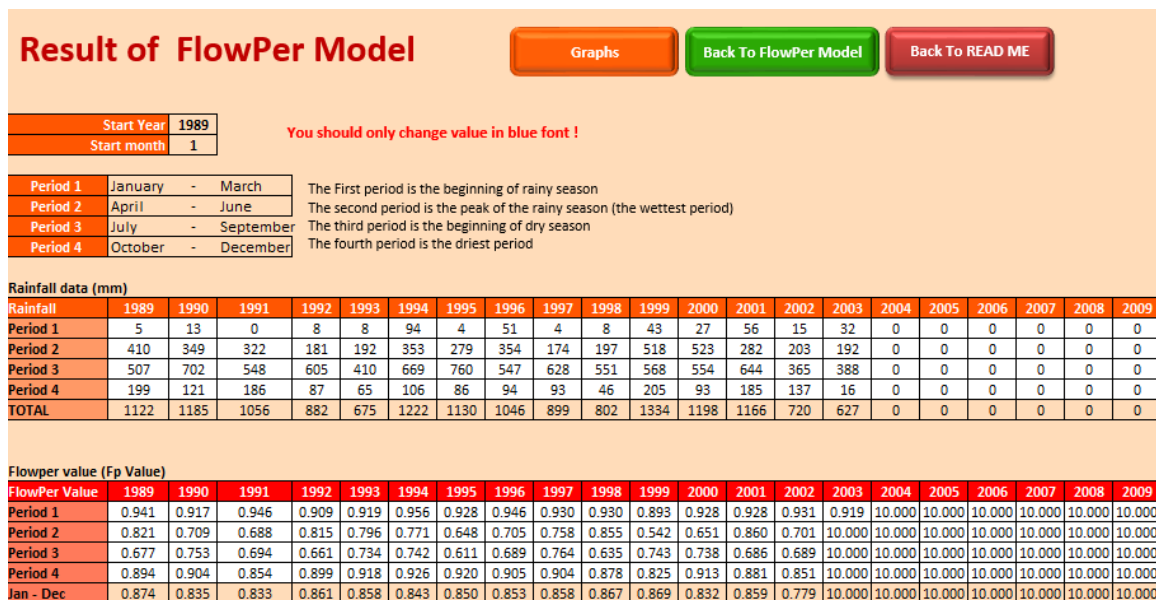

Figure 6. Page of FlowPer result

## EXAMPLE OF FLOWPER MODEL ANALYSIS

The result of FlowPer model is a value ( $F_p$ ) in the range between 0 and 1. If  $F_p = 1$  and  $\varepsilon = 0$  then river flow is constant, regardless of rainfall indication an ideally buffered system. If  $F_p = 0$  there is no relation between river flow on subsequent days suggesting and extremely "flashy" river that only depends on distribution of  $\varepsilon$ .

The analysis of  $F_p$  value can be done in two stages, the annual  $F_p$  and quarterly  $F_p$ . The annual  $F_p$  show the watershed condition based on one year data. The quarterly  $F_p$  show the  $F_p$  for each three months data. The purpose of the quarterly  $F_p$  analysis is see the condition of watershed during wet and dry season.

The  $F_p$ -value can also be analyzed against the year and rainfall.  $F_p$  value against the year to see the changes of  $F_p$  value from time to time whether increased, decreased or stable. The up-trend of  $F_p$  means that the watershed condition is going better and better, while the down-trend means the degradation of watershed. The  $F_p$  analysis against rainfall is to see the relationship between watershed condition and climate change. If there is relation between  $F_p$  value and rainfall, it means that that watershed is vulnerable to climate change.

The example of FlowPer analysis in this guideline is from Mae Chaem watershed (3740 km<sup>2</sup>), as part of the upper Ping Basin, Thailand. The rainfall data was an interpolation from six rainfall stations that obtained from Water resource Department, Meteorology Department and Royal Project. The daily river flow data was obtained from the Royal Irrigation Department (RID) river gauge station P.14 in Ob Luang and was taken from ICHARM website ([http://www.icharm.pwri.go.jp/html/network/pub\\_database\\_top\\_files/maecham\\_q.txt](http://www.icharm.pwri.go.jp/html/network/pub_database_top_files/maecham_q.txt)).

The result of FlowPer model in Mae Chaem watershed is shown by Table 1 and Figure 7. From the quarterly rainfall in the Table 1, the wet season in Mae Chaem watershed is in the period 3 (July-September) and the dry season is in the period 1 (January – March). Over 14 years (1989-2002), the result of  $F_p$  analysis shows stable trend with average of  $F_p$  0.85 (Figure 7A). But if we look at the quarterly analysis, in the wet season (period 3) the trend line has a decline tendency (Figure 7B). It means that the ability of watershed to buffer the peak rainfall event has been decreased.

$F_p$  analysis also shows a stable tendency towards rainfall changes (Figure 7C). But in the quarterly analysis, the trend of  $F_p$  value are decreasing (Figure 7D), the higher the rainfall amount, the smaller the  $F_p$  value. This condition is corresponding to Figure 7B.

Table 1. Annual and quarterly of rainfall and  $F_p$  value

| Year   | 1989          | 1990 | 1991 | 1992 | 1993 | 1994 | 1995 | 1996 | 1997 | 1998 | 1999 | 2000 | 2001 | 2002 | Avg* |
|--------|---------------|------|------|------|------|------|------|------|------|------|------|------|------|------|------|
| Period | Rainfall (mm) |      |      |      |      |      |      |      |      |      |      |      |      |      |      |
| 1      | 5             | 13   | 0    | 8    | 8    | 94   | 4    | 51   | 4    | 8    | 43   | 27   | 56   | 15   | 24   |
| 2      | 410           | 349  | 322  | 181  | 192  | 353  | 279  | 354  | 174  | 197  | 518  | 523  | 282  | 203  | 310  |
| 3      | 507           | 702  | 548  | 605  | 410  | 669  | 760  | 547  | 628  | 551  | 568  | 554  | 644  | 365  | 576  |
| 4      | 199           | 121  | 186  | 87   | 65   | 106  | 86   | 94   | 93   | 46   | 205  | 93   | 185  | 137  | 122  |
| TOTAL  | 1122          | 1185 | 1056 | 882  | 675  | 1222 | 1130 | 1046 | 899  | 802  | 1334 | 1198 | 1166 | 720  | 1031 |

| Period    | Fp-value |      |      |      |      |      |      |      |      |      |      |      |      |      |       |
|-----------|----------|------|------|------|------|------|------|------|------|------|------|------|------|------|-------|
| 1         | 0.94     | 0.92 | 0.95 | 0.91 | 0.92 | 0.96 | 0.93 | 0.95 | 0.93 | 0.93 | 0.89 | 0.93 | 0.93 | 0.93 | 0.929 |
| 2         | 0.82     | 0.71 | 0.69 | 0.82 | 0.80 | 0.77 | 0.65 | 0.71 | 0.76 | 0.86 | 0.54 | 0.65 | 0.86 | 0.70 | 0.737 |
| 3         | 0.68     | 0.75 | 0.69 | 0.66 | 0.73 | 0.74 | 0.61 | 0.69 | 0.76 | 0.64 | 0.74 | 0.74 | 0.69 | 0.69 | 0.701 |
| 4         | 0.89     | 0.90 | 0.85 | 0.90 | 0.92 | 0.93 | 0.92 | 0.90 | 0.90 | 0.88 | 0.83 | 0.91 | 0.88 | 0.85 | 0.891 |
| Jan - Dec | 0.87     | 0.84 | 0.83 | 0.86 | 0.86 | 0.84 | 0.85 | 0.85 | 0.86 | 0.87 | 0.87 | 0.83 | 0.86 | 0.78 | 0.848 |

\*Avg = average

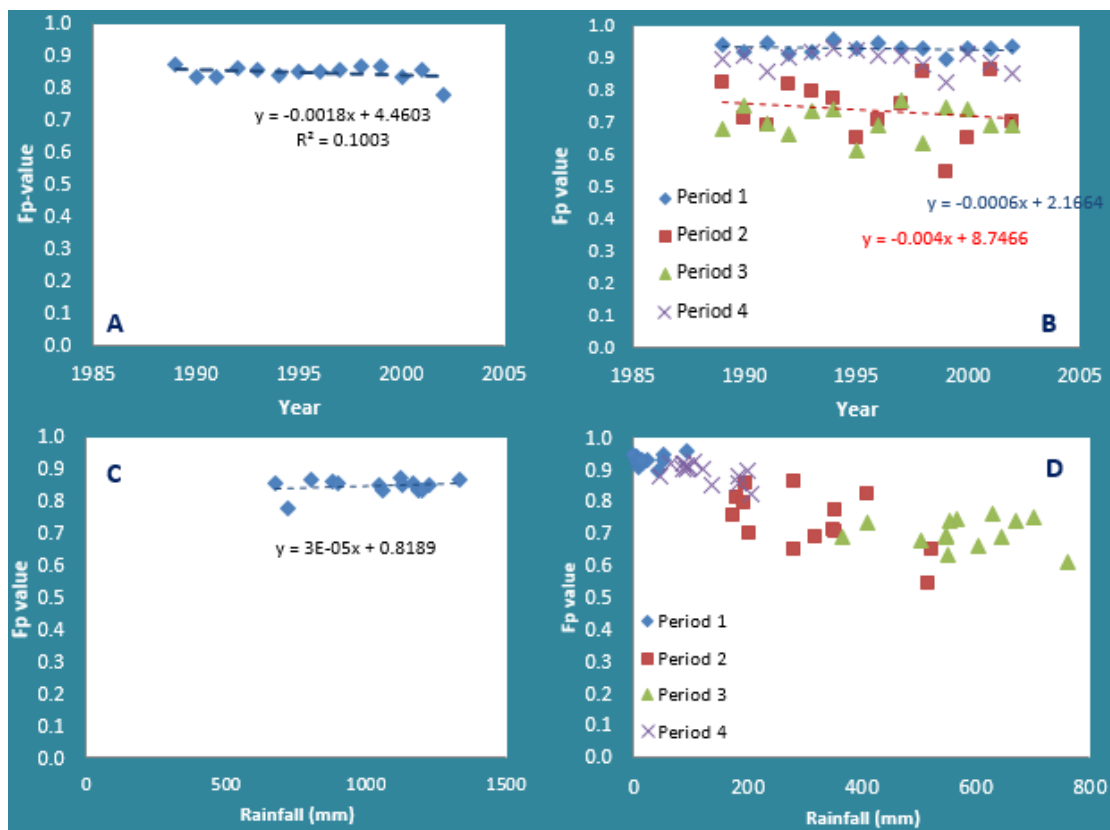

Figure 7. The example of the result of FlowPer model in Mae Chaem watershed.  
(period 1 = January – March, period 2 = April – June, period 3 = July – September,  
period 4 = October – December)
