# Supplementary material for: Flood risk reduction and flow buffering as ecosystem services – Part 2: Land use and rainfall intensity effects in Southeast Asia
Source: Copernicus journal article supplement (doi:10.5194/hess-21-2341-2017), 2017-05-05
Supplement: Supplementary file 2 [file hess-21-2341-2017-supplement.zip]

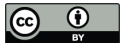

## *Supplement of*

# **Flood risk reduction and flow buffering as ecosystem services – Part 2: Land use and rainfall intensity effects in Southeast Asia**

**Meine van Noordwijk et al.**

*Correspondence to:* Meine van Noordwijk ([m.vannoordwijk@cgiar.org](mailto:m.vannoordwijk@cgiar.org))

- [hess-21-2341-2017-supplement-title-page.pdf](#)
- [Guideline to derive the Flow Persistence \(FlowPer\) Metric.docx](#)
- [Guideline to derive the Flow Persistence \(FlowPer\) Metric.pdf](#)
- [Hydrographs based on specified flow persistence.xlsm](#)

The copyright of individual parts of the supplement might differ from the CC-BY 3.0 licence.
